# Supplementary material for: First-principles study of thermoelectric properties of Mg2Si–Mg2Pb semiconductor materials
Source: Royal Society of Chemistry journal article supplement (doi:10.1039/c8ra02436g), 2018-01-01
Supplement: c8ra02436g1.pdf [file c8ra02436g1.pdf]

## First-principles study of thermoelectric properties of Mg<sub>2</sub>Si- Mg<sub>2</sub>Pb semiconductor materials

Tao Fan,<sup>\*ab</sup> Congwei Xie,<sup>ac</sup> Shiyao Wang,<sup>a</sup> Artem R. Oganov<sup>\*acd</sup> and Laifei Cheng<sup>b</sup>

<sup>a</sup>International Center for Materials Discovery, School of Materials Science and Engineering, Northwestern Polytechnical University, Xi'an, Shaanxi 710072, P. R. China. E-mail: nwpufant@mail.nwpu.edu.cn

<sup>b</sup>Science and Technology on Thermostructural Composite Materials Laboratory, School of Materials Science and Engineering, Northwestern Polytechnical University, Xi'an, Shaanxi 710072, P. R. China.

<sup>c</sup>Skolkovo Innovation Center, Skolkovo Institute of Science and Technology, Moscow 143026, Russia. E-mail: A.Oganov@skoltech.ru

<sup>d</sup>Moscow Institute of Physics and Technology, 9 Institutskiy Lane, Dolgoprudny City, Moscow Region 141700, Russia

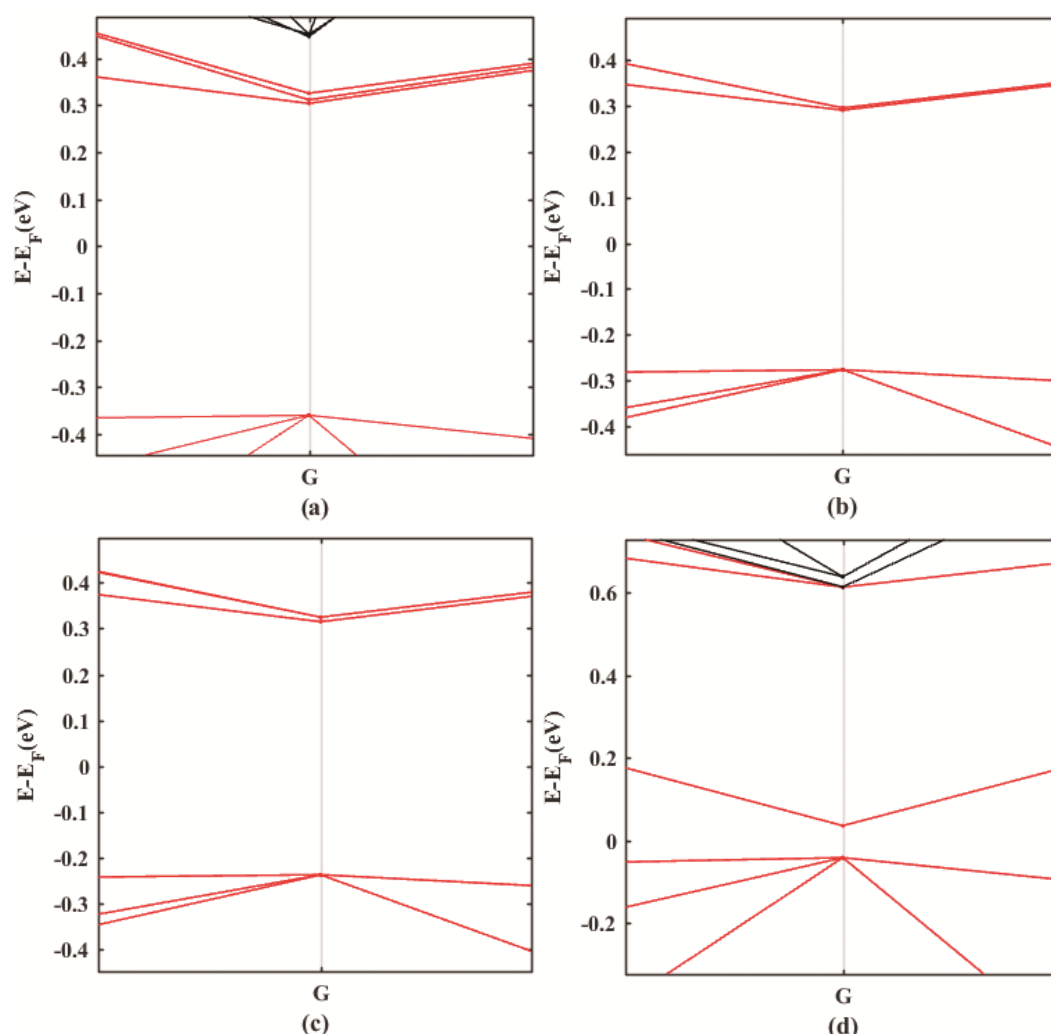

Fig. S1 Enlarged drawings of band structure near band gap. (a) Mg<sub>2</sub>Si; (b) Mg<sub>64</sub>Si<sub>31</sub>Pb; (c) Mg<sub>64</sub>Si<sub>30</sub>Pb<sub>2</sub>; (d) Mg<sub>8</sub>Si<sub>3</sub>Pb. In each figure, the Fermi level  $E_F$  was shifted to zero.

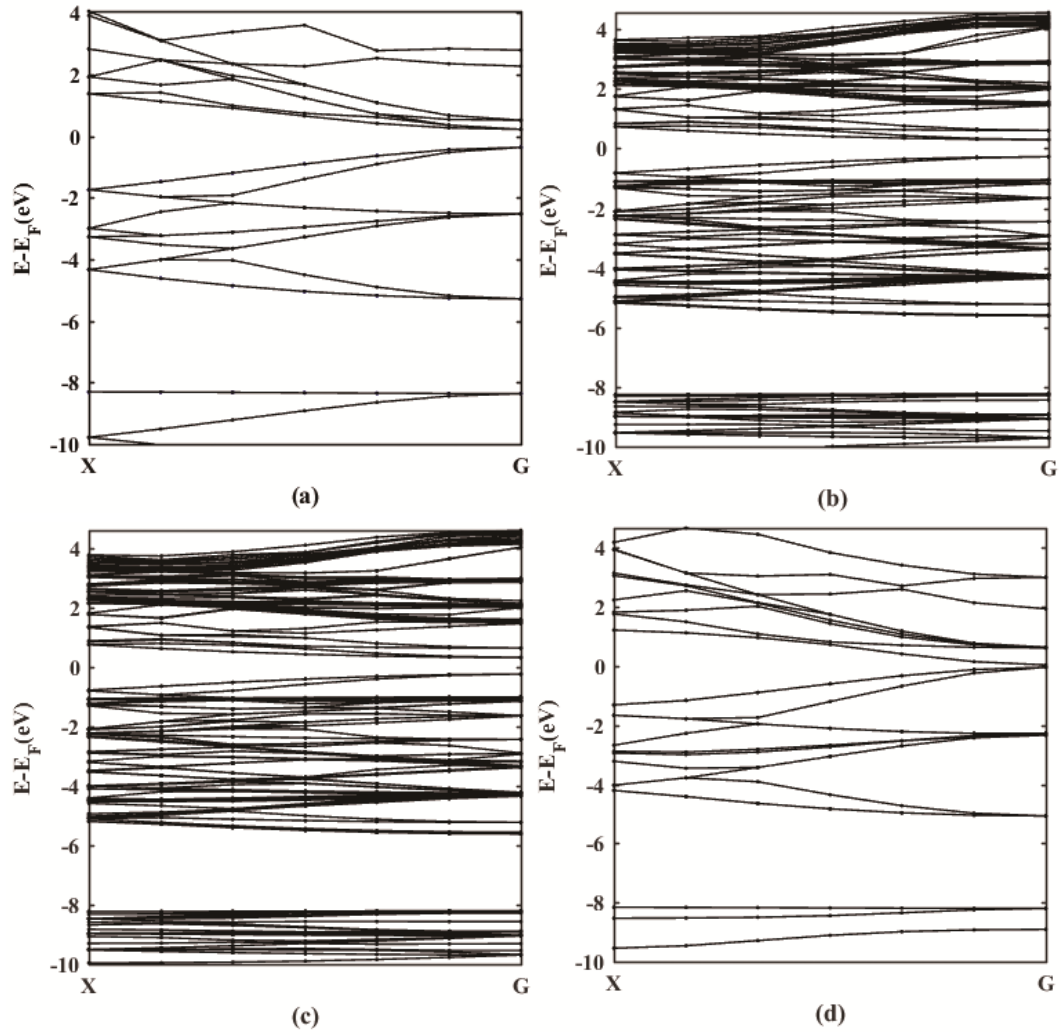

Fig. S2 Band structures along X-G path. (a)  $\text{Mg}_2\text{Si}$ ; (b)  $\text{Mg}_{64}\text{Si}_{31}\text{Pb}$ ; (c)  $\text{Mg}_{64}\text{Si}_{30}\text{Pb}_2$ ; (d)  $\text{Mg}_8\text{Si}_3\text{Pb}$ . In each figure, the Fermi level  $E_F$  was shifted to zero.
